# Supplementary material for: The RNA-binding protein ARPP21 controls dendritic branching by functionally opposing the miRNA it hosts
Source: PubMed Central journal article supplement (PMC5964322; doi:10.1038/s41467-018-03681-3), 2018-03-26
Supplement: 41467_2018_3681_MOESM3_ESM.pdf [file 41467_2018_3681_MOESM3_ESM.pdf]

## Description of Additional Supplementary Files

**File Name:** Supplementary Data 1

**Description:** Excel spreadsheet listing mRNAs identified in the ARPP21 iCLIP and all transcripts detected in the public TReX-293 RNA-Seq dataset. The TReX-293 expression data was used as background control for the KEGG pathway enrichment analysis and for the Supplementary Data 2.

**File Name:** Supplementary Data 2

**Description:** Excel spreadsheet listing conserved miR-128 target mRNA predictions from TargetsScan 7.1. Predicted genes that were not expressed in the TReX-293 cells (see Supplementary Data 1) are marked in column three.

**File Name:** Supplementary Data 3

**Description:** Excel spreadsheet showing the intersection of ARPP21 iCLIP targets and predicted miR-128 target mRNAs from TargetScan7.1.

**File Name:** Supplementary Data 4

**Description:** Excel spreadsheet listing transcripts not bound by ARPP21 that are expressed in TReX-293 cells with a TPM value above the lowest TPM of all ARPP21 iCLIP targets.

**File Name:** Supplementary Data 5

**Description:** Excel spreadsheet listing transcripts bound by ARPP21 with their respective CL-events and TPM.
